# Supplementary material for: Four In Silico Designed and Validated qPCR Assays to Detect and Discriminate Tilletia indica and T. walkeri, Individually or as a Complex
Source: MDPI journal article supplement (doi:10.3390/biology10121295), 2021-12-08
Supplement: s1 [file s1]

**Supplementary Data S1. A.** Sequence alignment of the genic region OG08220 for *Tilletia walkeri* and *T. indica* isolates sequenced by Nguyen et al. [43]. Highlighted regions correspond to the qPCR primer sequences (grey) and the probe sequence (yellow).

|                        |     |     |     |     |     |     |     |
|------------------------|-----|-----|-----|-----|-----|-----|-----|
|                        | 241 | 250 | 260 | 270 | 280 | 290 | 300 |
|                        |     |     |     |     |     |     |     |
| T_walkeri_DAOMC_230849 | G   | G   | T   | G   | A   | A   | T   |
| T_walkeri_DAOMC_236422 | G   | G   | T   | G   | A   | A   | T   |
| T_indica_DAOMC_236408  | G   | G   | T   | G   | A   | A   | T   |
| T_indica_DAOMC_236414  | G   | G   | T   | G   | A   | A   | T   |
| T_indica_DAOMC_236416  | G   | G   | T   | G   | A   | A   | T   |
|                        | 301 | 310 | 320 | 330 | 340 | 350 | 360 |
|                        |     |     |     |     |     |     |     |
| T_walkeri_DAOMC_230849 | G   | G   | T   | G   | A   | A   | T   |
| T_walkeri_DAOMC_236422 | G   | G   | T   | G   | A   | A   | T   |
| T_indica_DAOMC_236408  | G   | G   | T   | G   | A   | A   | T   |
| T_indica_DAOMC_236414  | G   | G   | T   | G   | A   | A   | T   |
| T_indica_DAOMC_236416  | G   | G   | T   | G   | A   | A   | T   |
|                        | 361 | 370 | 380 | 390 | 400 | 410 | 420 |
|                        |     |     |     |     |     |     |     |
| T_walkeri_DAOMC_230849 | G   | T   | C   | A   | G   | A   | G   |
| T_walkeri_DAOMC_236422 | G   | T   | C   | A   | G   | A   | G   |
| T_indica_DAOMC_236408  | G   | T   | C   | A   | G   | A   | G   |
| T_indica_DAOMC_236414  | G   | T   | C   | A   | G   | A   | G   |
| T_indica_DAOMC_236416  | G   | T   | C   | A   | G   | A   | G   |

**Supplementary Data S1. B.** Sequence alignment of the isolates sequenced by Nguyen et al. [43] presenting part of the region OG01193 unique to *Tilletia walkeri* and *T. indica* used for the qPCR assay design. Highlighted regions correspond to the qPCR primer sequences (grey), and the probe sequence (yellow). Differences with the non-target species in the alignment are highlighted in cyan.

|                            |     |     |     |     |     |     |     |
|----------------------------|-----|-----|-----|-----|-----|-----|-----|
|                            | 121 | 130 | 140 | 150 | 160 | 170 | 180 |
|                            |     |     |     |     |     |     |     |
| T_caries_DAOMC_238032      | C   | T   | A   | C   | C   | G   | C   |
| T_laevis_ATCC_42080        | C   | T   | A   | C   | C   | G   | C   |
| T_laevis_DAOMC_238040      | C   | T   | A   | C   | C   | G   | C   |
| T_controversa_DAOMC_236426 | C   | T   | A   | C   | C   | G   | C   |
| T_controversa_DAOMC_238052 | C   | T   | A   | C   | C   | G   | C   |
| T_indica_DAOMC_236414      | C   | T   | A   | C   | C   | G   | C   |
| T_indica_DAOMC_236416      | C   | T   | A   | C   | C   | G   | C   |
| T_indica_DAOMC_236408      | C   | T   | A   | C   | C   | G   | C   |
| T_walkeri_DAOMC_236422     | C   | T   | A   | C   | C   | G   | C   |
| T_walkeri_DAOMC_230849     | C   | T   | A   | C   | C   | G   | C   |
|                            | 181 | 190 | 200 | 210 | 220 | 230 | 240 |
|                            |     |     |     |     |     |     |     |
| T_caries_DAOMC_238032      | A   | A   | C   | T   | T   | C   | G   |
| T_laevis_ATCC_42080        | A   | A   | C   | T   | T   | C   | G   |
| T_laevis_DAOMC_238040      | A   | A   | C   | T   | T   | C   | G   |
| T_controversa_DAOMC_236426 | A   | A   | C   | T   | T   | C   | G   |
| T_controversa_DAOMC_238052 | A   | A   | C   | T   | T   | C   | G   |
| T_indica_DAOMC_236414      | A   | A   | C   | T   | T   | C   | G   |
| T_indica_DAOMC_236416      | A   | A   | C   | T   | T   | C   | G   |
| T_indica_DAOMC_236408      | A   | A   | C   | T   | T   | C   | G   |
| T_walkeri_DAOMC_236422     | A   | A   | C   | T   | T   | C   | G   |
| T_walkeri_DAOMC_230849     | A   | A   | C   | T   | T   | C   | G   |
|                            | 241 | 250 | 260 | 270 | 280 | 290 | 300 |
|                            |     |     |     |     |     |     |     |
| T_caries_DAOMC_238032      | T   | G   | C   | T   | G   | C   | C   |
| T_laevis_ATCC_42080        | T   | G   | C   | T   | G   | C   | C   |
| T_laevis_DAOMC_238040      | T   | G   | C   | T   | G   | C   | C   |
| T_controversa_DAOMC_236426 | T   | G   | C   | T   | G   | C   | C   |
| T_controversa_DAOMC_238052 | T   | G   | C   | T   | G   | C   | C   |
| T_indica_DAOMC_236414      | T   | G   | C   | T   | G   | C   | C   |
| T_indica_DAOMC_236416      | T   | G   | C   | T   | G   | C   | C   |
| T_indica_DAOMC_236408      | T   | G   | C   | T   | G   | C   | C   |
| T_walkeri_DAOMC_236422     | T   | G   | C   | T   | G   | C   | C   |
| T_walkeri_DAOMC_230849     | T   | G   | C   | T   | G   | C   | C   |
|                            | 301 | 310 | 320 | 330 | 340 | 350 | 360 |
|                            |     |     |     |     |     |     |     |
| T_caries_DAOMC_238032      | A   | G   | A   | T   | T   | C   | G   |
| T_laevis_ATCC_42080        | A   | G   | A   | T   | T   | C   | G   |
| T_laevis_DAOMC_238040      | A   | G   | A   | T   | T   | C   | G   |
| T_controversa_DAOMC_236426 | A   | G   | A   | T   | T   | C   | G   |
| T_controversa_DAOMC_238052 | A   | G   | A   | T   | T   | C   | G   |
| T_indica_DAOMC_236414      | A   | G   | A   | T   | T   | C   | G   |
| T_indica_DAOMC_236416      | A   | G   | A   | T   | T   | C   | G   |
| T_indica_DAOMC_236408      | A   | G   | A   | T   | T   | C   | G   |
| T_walkeri_DAOMC_236422     | A   | G   | A   | T   | T   | C   | G   |
| T_walkeri_DAOMC_230849     | A   | G   | A   | T   | T   | C   | G   |
