# Supplementary material for: Four In Silico Designed and Validated qPCR Assays to Detect and Discriminate Tilletia indica and T. walkeri, Individually or as a Complex
Source: MDPI journal article supplement (doi:10.3390/biology10121295), 2021-12-08
Supplement: s1 [file s1]

**Supplementary Table S1.** Non-*Tilletia* wheat or grass pathogens and wheat (host plant) against which the qPCR assays were tested.

| Species                             | Voucher <sup>a</sup> | Disease associated          | ITS GenBank Acc. No. | Reference                   |
|-------------------------------------|----------------------|-----------------------------|----------------------|-----------------------------|
| <i>Alternaria alternata</i>         | DAOMC 234879         | Black point / smudge        | OL636518             | this study                  |
| <i>Aspergillus foetidus</i>         | KAS3540              | Grain-storage molds         | OL636513             | this study                  |
| <i>Bipolaris sorokiniana</i>        | DAOMC 226217         | Spot blotch                 | OL636509             | this study                  |
| <i>Blumeria graminis</i>            | DAOM 38670           | Powdery mildew              | OL712411             | this study                  |
| <i>Cladosporium allicinum</i>       | KAS4624              | Black (sooty) head mold     | OL636514             | this study                  |
| <i>Cladosporium herbarum</i>        | JB2212               | Black (sooty) head mold     | OL636517             | this study                  |
| <i>Didymella glomerata</i>          | JB2038               | Leaf spot / leaf blight     | OL636515             | this study                  |
| <i>Didymella glomerata</i>          | JB2113               | Leaf spot / leaf blight     | OL636516             | this study                  |
| <i>Fusarium graminearum</i>         | SH1008               | Fusarium head blight (Scab) | OL636519             | this study                  |
| <i>Parastagonospora nodorum</i>     | DAOMC 226222         | Glume blotch                | OL636510             | this study                  |
| <i>Penicillium verrucosum</i>       | KAS6850              | Grain-storage molds         | OL636512             | this study                  |
| <i>Puccinia graminis</i>            | RS1924               | Stem rust                   | OL712413             | this study                  |
| <i>Puccinia pseudostriiformis</i>   | PUR N5368            | Stripe rust                 | HM057133             | [68]                        |
| <i>Puccinia pseudostriiformis</i>   | PUR 59844            | Stripe rust                 | MT965634             | [69]                        |
| <i>Puccinia striiformis</i>         | PUR 66275            | Stripe rust                 | HM057112             | [68]                        |
| <i>Puccinia striiformis</i>         | DAOM 240069          | Stripe rust                 | HM057118             | [68]                        |
| <i>Puccinia striiformis</i>         | BPI 193871           | Stripe rust                 | HM057135             | [68]                        |
| <i>Puccinia striiformoides</i>      | PUR N5378            | Stripe rust                 | HM057110             | [68]                        |
| <i>Puccinia striiformoides</i>      | K(M): 108141         | Stripe rust                 | HM057125             | [68]                        |
| <i>Puccinia striiformoides</i>      | PUR N5374            | Stripe rust                 | HM057111             | [68]                        |
| <i>Puccinia triticina</i>           | DAOM 240852          | Leaf rust                   | HQ012456             | [70]                        |
| <i>Pyrenophora tritici-repentis</i> | DAOMC 226213         | Tan spot                    | JN943670             | Fungal Barcoding Consortium |
| <i>Septoria glycines</i>            | DAOMC 226244         | Brown spot                  | OL636511             | this study                  |
| <i>Triticum</i> sp.                 | RS2089               | None; uninfected wheat host | OL712415             | this study                  |
| <i>Urocystis tritici</i>            | RS2070               | Flag smut of wheat          | OL712414             | this study                  |
| <i>Ustilago nuda</i>                | RS220                | Loose smut of barley        | OL712412             | this study                  |

<sup>a</sup> **DAOM:** Canadian National Mycological Herbarium, Ottawa, ON, Canada; **DAOMC:** Canadian Collection of Fungal Cultures, Ottawa, ON, Canada; **PUR:** Arthur Herbarium, Purdue University, West Lafayette, IN, USA; **BPI:** US National Fungus Collections, USDA-ARS, Beltsville, MD, USA.; **K(M):** Royal Botanic Gardens, Kew, UK; **KAS, JB, RS, SH:** AAFC internal DNA ID identifiers.
